# Supplementary material
Source: MDPI journal article supplement (https://www.mdpi.com/2073-4433/14/7/1175)
Supplement: s1 [file s1]

## Supplementary Material: Volatility of a Ship Emission in the Baltic Sea Using Modelling and Measurements in Real-World Conditions

Oskari Kangasniemi, Pauli Simonen, Jana Moldanová, Hilikka Timonen, Luis M. F. Barreira, Heidi Hellén, Jukka-Pekka Jalkanen, Elisa Majamäki, Barbara D'Anna, Grazia Lanzafame, Brice Temime-Roussel, Johan Mellqvist, Jorma Keskinen and Miikka Dal Maso

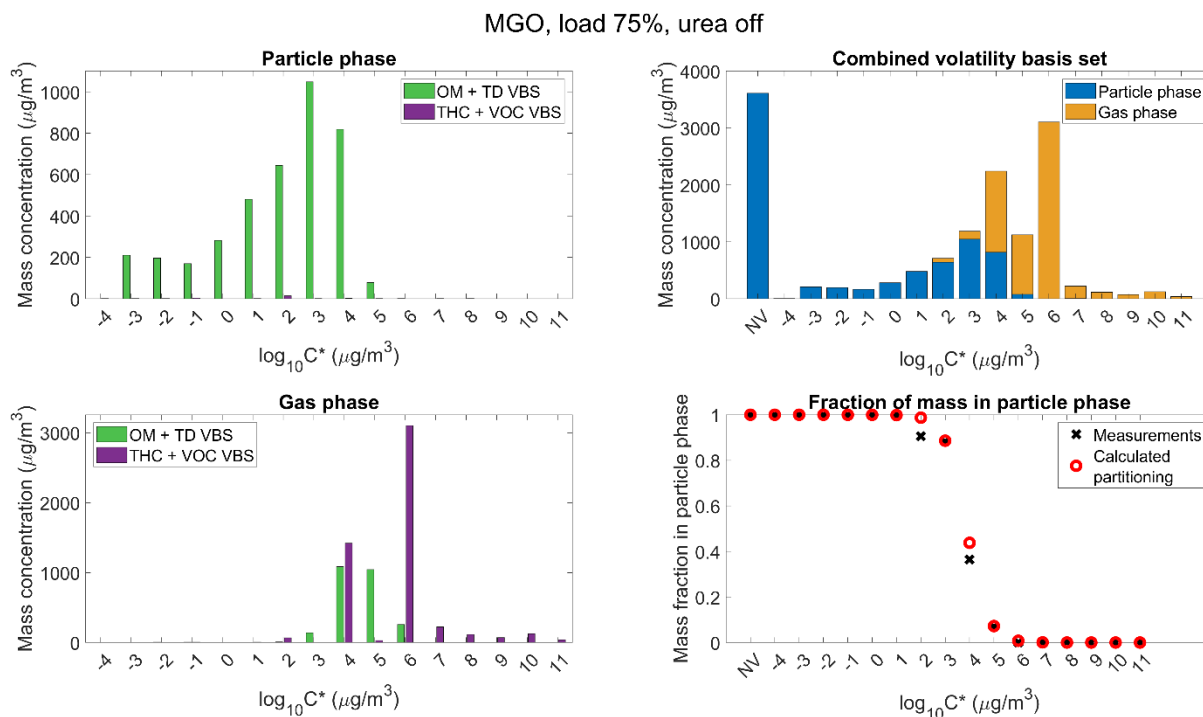

**Figure S1.** The gas and particle phase concentrations for marine gas oil (MGO) with 75% engine load and without urea after treatment divided in volatility bins based on organic matter (OM) concentration measurements combined with thermodenuder (TD) derived volatility distribution and total hydrocarbon (THC) concentration measurements combined with volatile organic compound (VOC) derived from STEAM emission inventory. For each bin, the higher gas or particle phase concentration is taken as the “correct” one and used in the combined volatility distribution. The mass fraction in the particle phase according to this treatment is then compared to one calculated using partitioning equation to confirm the feasibility of this approach.

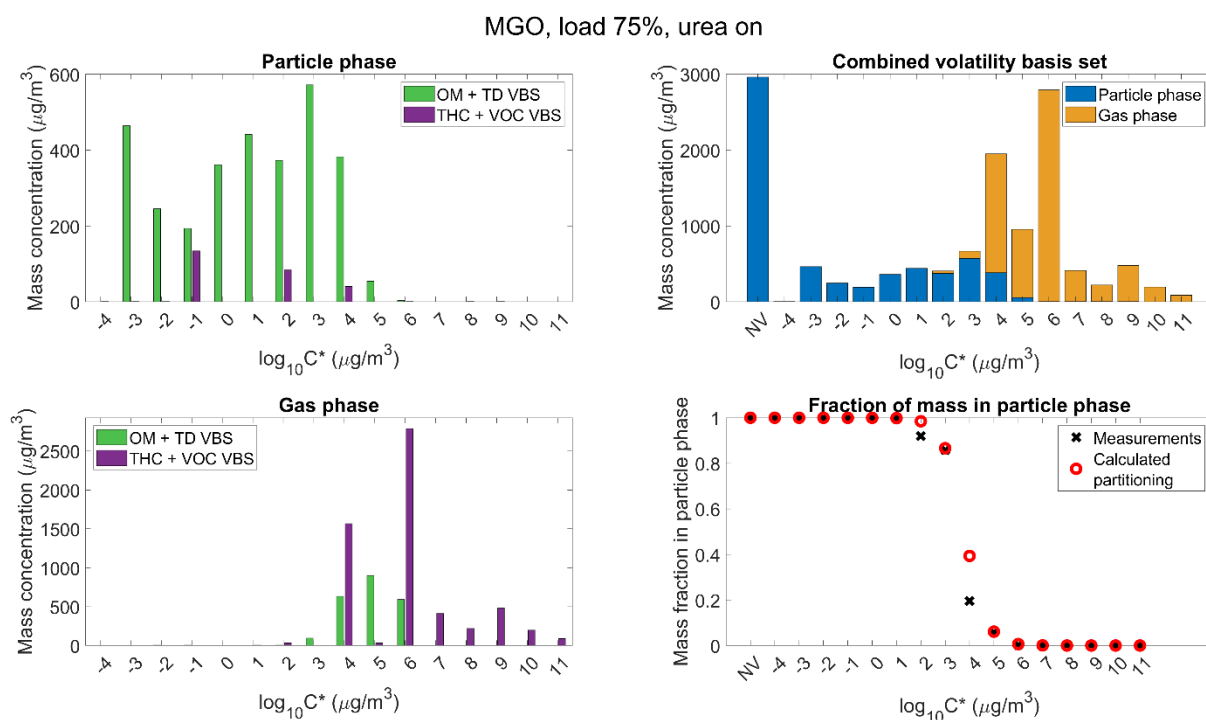

**Figure S2.** The gas and particle phase concentrations for marine gas oil with 75% engine load and with urea after treatment divided in volatility bins and combined to one volatility distribution as described in Figure S1.

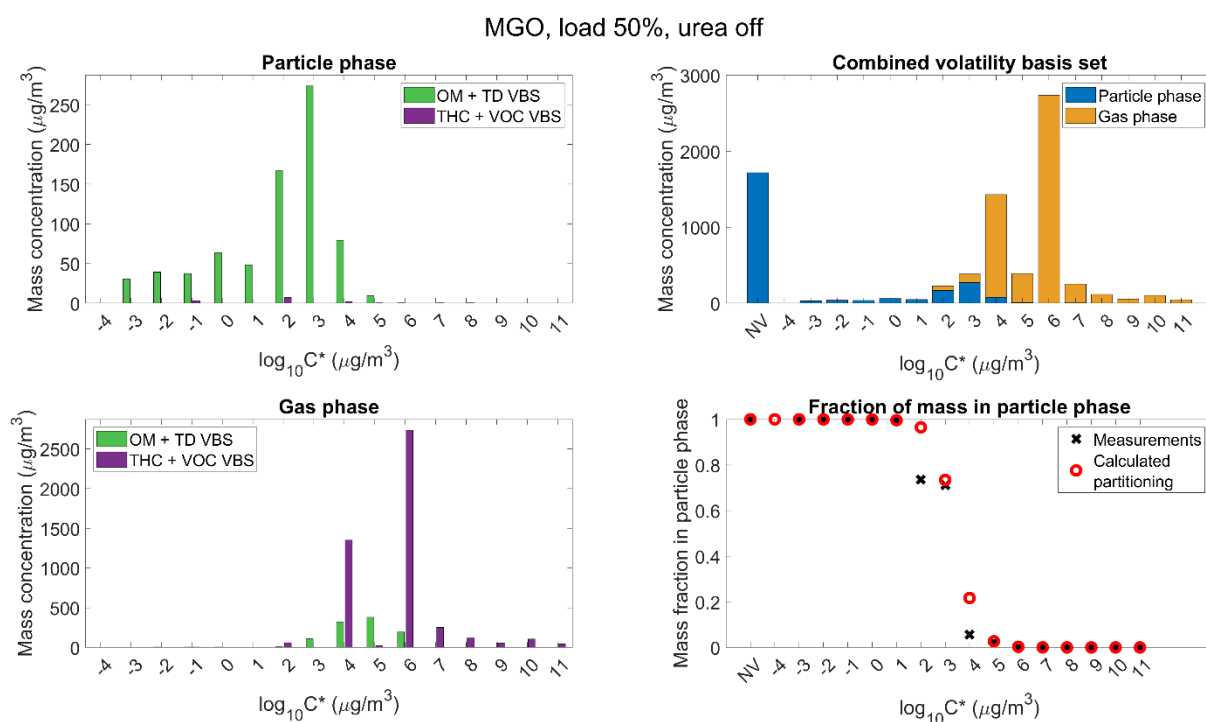

**Figure S3.** The gas and particle phase concentrations for marine gas oil with 50% engine load and without urea after treatment divided in volatility bins and combined to one volatility distribution as described in Figure S1.

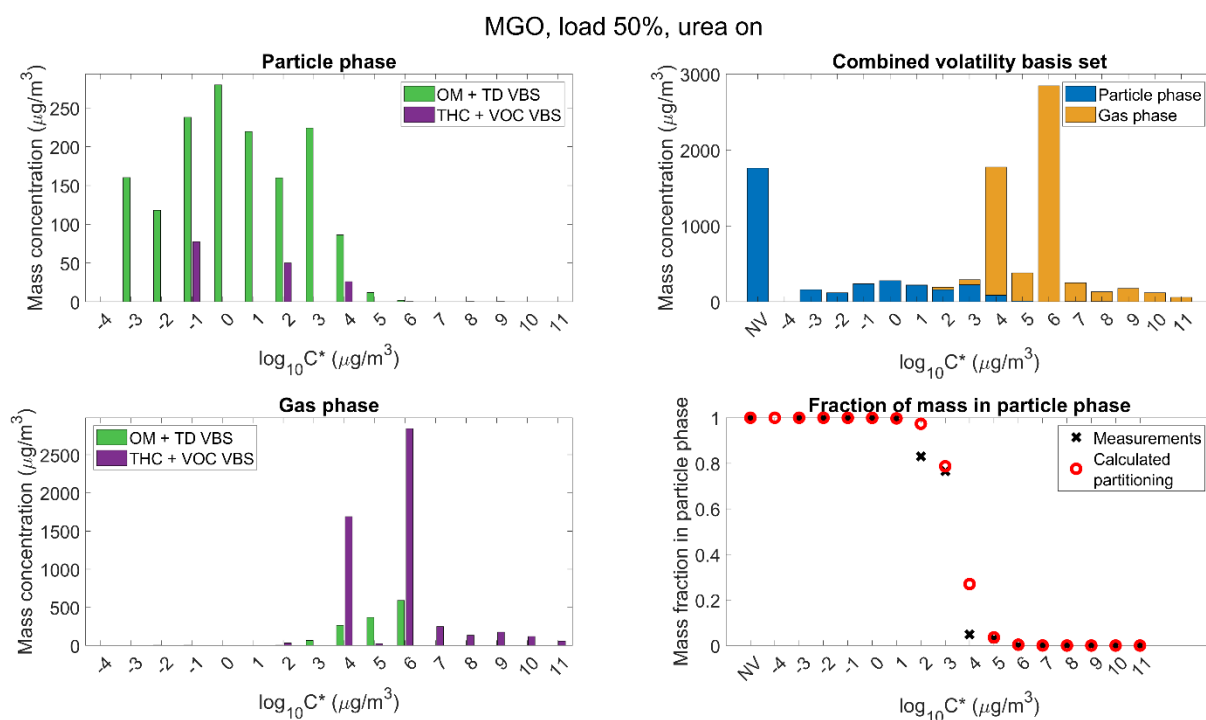

**Figure S4.** The gas and particle phase concentrations for marine gas oil with 50% engine load and with urea after treatment divided in volatility bins and combined to one volatility distribution as described in Figure S1.

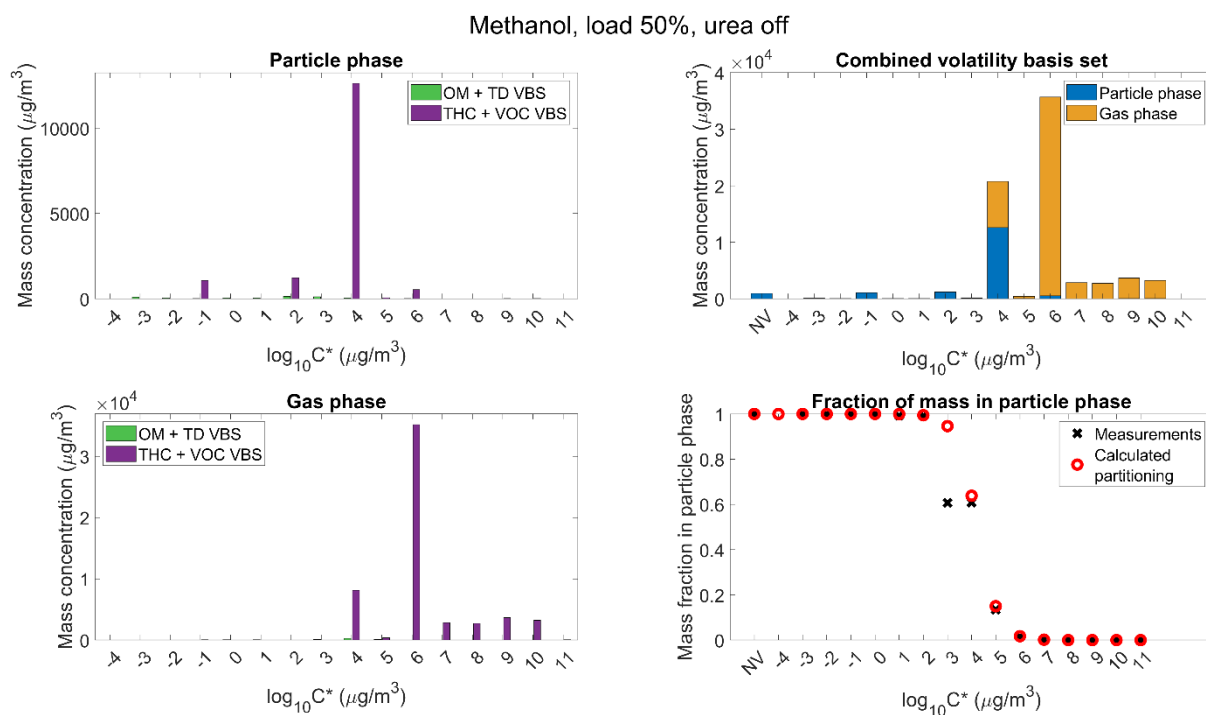

**Figure S5.** The gas and particle phase concentrations methanol fuel with 50% engine load and without urea after treatment divided in volatility bins and combined to one volatility distribution as described in Figure S1.

**Table S1.** Identified gas phase organic species, their effective saturation concentrations  $C^*$ , volatility bins ( $\log_{10}C^*$ ) and their mass fraction % from the total organic mass for each five fuel, engine load and after-treatment combinations. There are pairs of species in oxygenated VOCs which could not be distinguished from each other in which case they were assumed to be divided in equal halves.

| Identified species               | $C^*$ ( $\mu\text{g}/\text{m}^3$ ) | Volatility bin | Mass fraction % of total organic mass |                    |                     |                    |                          |
|----------------------------------|------------------------------------|----------------|---------------------------------------|--------------------|---------------------|--------------------|--------------------------|
|                                  |                                    |                | MGO 75%<br>Urea on                    | MGO 75%<br>Urea on | MGO 50%<br>Urea off | MGO 50%<br>Urea on | Methanol<br>50% Urea off |
| <b>Polyaromatic hydrocarbons</b> |                                    |                |                                       |                    |                     |                    |                          |
| Naphthalene                      | $7.01 \times 10^5$                 | 6              | 0.013                                 | 0.013              |                     |                    |                          |
| 2-methylnaphthalene              | $5.98 \times 10^5$                 | 6              | 0.018                                 | 0.025              |                     |                    |                          |
| 1-methylnaphthalene              | $6.97 \times 10^5$                 | 6              | 0.010                                 | 0.015              |                     |                    |                          |
| Biphenyl                         | $1.11 \times 10^5$                 | 5              | 0.005                                 | 0.005              |                     |                    |                          |
| 2,3-dimethylnaphthalene          | $1.23 \times 10^4$                 | 4              | 0.007                                 | 0.009              |                     |                    |                          |
| Acenaphthylene                   | $5.24 \times 10^4$                 | 5              | 0.002                                 | 0.003              |                     |                    |                          |
| Acenaphthene                     | $2.43 \times 10^4$                 | 4              | 0.001                                 | 0.001              |                     |                    |                          |
| 2,3,5-trimethylnaphthalene       | $5.01 \times 10^4$                 | 5              | 0.002                                 | 0.003              |                     |                    |                          |
| Fluorene                         | $7.33 \times 10^3$                 | 4              | 0.002                                 | 0.002              |                     |                    |                          |
| 1-methylfluorene                 | $4.07 \times 10^3$                 | 4              | 0.001                                 | 0.001              |                     |                    |                          |
| Phenanthrene                     | $1.62 \times 10^3$                 | 3              | 0.004                                 | 0.004              |                     |                    |                          |
| Anthracene                       | $8.76 \times 10^1$                 | 2              | 0.000                                 | 0.000              |                     |                    |                          |
| 2-methylphenanthrene             | $9.89 \times 10^2$                 | 3              | 0.001                                 | 0.001              |                     |                    |                          |
| 3-methylphenanthrene             | $9.89 \times 10^2$                 | 3              | 0.001                                 | 0.001              |                     |                    |                          |
| 1-methylphenanthrene             | $2.22 \times 10^2$                 | 2              | 0.000                                 | 0.001              |                     |                    |                          |
| 1-methylanthracene               | $1.32 \times 10^6$                 | 6              | 0.000                                 | 0.001              |                     |                    |                          |
| 2-phenylnaphthalene              | $5.65 \times 10^2$                 | 3              | 0.000                                 | 0.000              |                     |                    |                          |
| Fluoranthene                     | $1.47 \times 10^2$                 | 2              | 0.000                                 | 0.000              |                     |                    |                          |
| Pyrene                           | $7.19 \times 10^1$                 | 2              | 0.000                                 | 0.001              |                     |                    |                          |
| 1-methylfluoranthene             | $9.45 \times 10^2$                 | 3              | 0.000                                 | 0.000              |                     |                    |                          |
| Retene                           | $5.13 \times 10^1$                 | 2              | 0.000                                 | 0.000              |                     |                    |                          |
| 1-methylpyrene                   | $2.80 \times 10^1$                 | 1              | 0.000                                 | 0.000              |                     |                    |                          |
| Benzo(a)anthracene               | $3.97 \times 10^0$                 | 1              | 0.000                                 | 0.000              |                     |                    |                          |
| Chrysene                         | $1.19 \times 10^1$                 | 1              | 0.000                                 | 0.000              |                     |                    |                          |
| 2-methylchrysene                 | $5.20 \times 10^0$                 | 1              | 0.000                                 | 0.000              |                     |                    |                          |
| 5-methylchrysene                 | $1.12 \times 10^1$                 | 1              | 0.000                                 | 0.000              |                     |                    |                          |
| Benzo(b)fluoranthene             | $1.10 \times 10^1$                 | 1              | 0.000                                 | 0.000              |                     |                    |                          |
| Benzo(k)fluoranthene             | $2.12 \times 10^{-2}$              | -2             | 0.000                                 | 0.000              |                     |                    |                          |
| Benzo(e)pyrene                   | $1.25 \times 10^{-1}$              | -1             | 0.000                                 | 0.000              |                     |                    |                          |
| Benzo(a)pyrene                   | $1.20 \times 10^{-1}$              | -1             | 0.000                                 | 0.000              |                     |                    |                          |
| Perylene                         | $1.15 \times 10^{-1}$              | -1             | 0.000                                 | 0.000              |                     |                    |                          |
| Indeno(1,2,3-c,d)pyrene          | $3.15 \times 10^{-3}$              | -3             | 0.000                                 | 0.000              |                     |                    |                          |
| Dibenzo(a,h)anthracene           | $2.43 \times 10^{-2}$              | -2             | 0.000                                 | 0.000              |                     |                    |                          |
| Benzo(g,h,i)perylene             | $2.52 \times 10^{-3}$              | -3             | 0.000                                 | 0.000              |                     |                    |                          |
| Coronene                         | $6.24 \times 10^{-5}$              | -4             | 0.000                                 | 0.000              |                     |                    |                          |

| Dibenzothiophenes                                                                                                                   |                         |    |        |        |        |        |        |
|-------------------------------------------------------------------------------------------------------------------------------------|-------------------------|----|--------|--------|--------|--------|--------|
| Dibenzothiophene                                                                                                                    | 2.71 x 10 <sup>3</sup>  | 3  | 0.000  | 0.000  |        |        |        |
| 2-methyldibenzothiophene                                                                                                            | 1.02 x 10 <sup>3</sup>  | 3  | 0.000  | 0.000  |        |        |        |
| 1-methyldibenzothiophene                                                                                                            | 1.02 x 10 <sup>3</sup>  | 3  | 0.000  | 0.000  |        |        |        |
| 4-methyldibenzothiophene                                                                                                            | 1.02 x 10 <sup>3</sup>  | 3  | 0.000  | 0.000  |        |        |        |
| 2.8-dimethyldibenzothiophene                                                                                                        | 1.74 x 10 <sup>2</sup>  | 2  | 0.000  | 0.000  |        |        |        |
| 2.4.7-trimethyldibenzothiophene                                                                                                     | 1.94 x 10 <sup>2</sup>  | 2  | 0.000  | 0.000  |        |        |        |
| Oxygenated VOCs                                                                                                                     |                         |    |        |        |        |        |        |
| (CH <sub>2</sub> O)H+ formic aldehyde*                                                                                              | 7.01 x 10 <sup>9</sup>  | 10 | 0.472  | 0.344  | 0.416  | 0.259  | 2.263  |
| (CH <sub>3</sub> OH)H+ methanol                                                                                                     | 2.44 x 10 <sup>8</sup>  | 8  | 0.018  | 0.142  | 0.017  | 0.119  | 1.423  |
| (C <sub>2</sub> H <sub>4</sub> O)H+ acetaldehyde                                                                                    | 2.21 x 10 <sup>9</sup>  | 9  | 0.289  | 0.295  | 0.245  | 0.178  | 0.303  |
| (CH <sub>2</sub> O <sub>2</sub> )H+ formic acid                                                                                     | 1.56 x 10 <sup>8</sup>  | 8  | 0.594  | 0.683  | 0.524  | 0.503  | 0.817  |
| (C <sub>2</sub> H <sub>6</sub> O)H+ ethanol                                                                                         | 1.52 x 10 <sup>8</sup>  | 8  | 0.006  | 0.001  | 0.007  | 0.001  | 0.004  |
| (C <sub>3</sub> H <sub>6</sub> O)H+ acetone                                                                                         | 7.26 x 10 <sup>8</sup>  | 9  | 0.032  | 0.068  | 0.025  | 0.031  | 0.055  |
| (C <sub>2</sub> H <sub>4</sub> O <sub>2</sub> )H+ <b>acetic acid</b> /glycolaldehyde                                                | 6.30 x 10 <sup>7</sup>  | 8  | 1.362  | 2.385  | 1.722  | 1.548  | 1.338  |
| (C <sub>2</sub> H <sub>4</sub> O <sub>2</sub> )H+ acetic acid/ <b>glycolaldehyde</b>                                                | 1.99 x 10 <sup>7</sup>  | 7  | 3.184  | 5.242  | 4.250  | 3.387  | 2.703  |
| (C <sub>4</sub> H <sub>6</sub> O)H+ <b>methyl ethyl ketone</b> . methacrolein                                                       | 3.51 x 10 <sup>8</sup>  | 9  | 0.022  | 0.029  | 0.018  | 0.020  | 0.025  |
| (C <sub>4</sub> H <sub>6</sub> O)H+ methyl ethyl ketone. <b>methacrolein</b>                                                        | 5.85 x 10 <sup>8</sup>  | 9  | 0.022  | 0.029  | 0.018  | 0.020  | 0.025  |
| (C <sub>4</sub> H <sub>2</sub> O <sub>3</sub> )H+ maleic anhydride or maleic acid frag (-H <sub>2</sub> O)                          | 1.64 x 10 <sup>6</sup>  | 6  | 59.388 | 45.721 | 57.583 | 51.825 | 49.767 |
| (C <sub>5</sub> H <sub>4</sub> O <sub>3</sub> )H+ <b>citraconic anhydride</b> or citraconic acid frag (-H <sub>2</sub> O)           | 6.99 x 10 <sup>6</sup>  | 7  | 1.023  | 1.386  | 1.006  | 1.088  | 1.244  |
| (C <sub>5</sub> H <sub>4</sub> O <sub>3</sub> )H+ citraconic anhydride or <b>citraconic acid</b> frag (-H <sub>2</sub> O)           | 2.89 x 10 <sup>2</sup>  | 2  | 1.023  | 1.386  | 1.006  | 1.088  | 1.244  |
| (C <sub>8</sub> H <sub>4</sub> O <sub>3</sub> )H+ phthalic anhydride or phthalic acid frag (-H <sub>2</sub> O)                      | 4.27 x 10 <sup>3</sup>  | 4  | 27.292 | 26.425 | 28.439 | 31.268 | 28.913 |
| (C <sub>9</sub> H <sub>6</sub> O <sub>3</sub> )H+ <b>methyl phthalic anhydride</b> or methyl phthalic acid frag (-H <sub>2</sub> O) | 6.36 x 10 <sup>4</sup>  | 5  | 0.535  | 0.528  | 0.406  | 0.420  | 0.478  |
| (C <sub>9</sub> H <sub>6</sub> O <sub>3</sub> )H+ methyl phthalic anhydride or <b>methyl phthalic acid</b> frag (-H <sub>2</sub> O) | 2.67 x 10 <sup>2</sup>  | 2  | 0.535  | 0.528  | 0.406  | 0.420  | 0.478  |
| Cicloalkanes/alkenes VOCs (µg/kg fuel)                                                                                              |                         |    |        |        |        |        |        |
| (C <sub>3</sub> H <sub>4</sub> )H+ HC fragments                                                                                     | 1.26 x 10 <sup>10</sup> | 10 | 0.310  | 0.466  | 0.270  | 0.302  | 0.381  |
| (C <sub>3</sub> H <sub>6</sub> )H+ propene + HC fragments                                                                           | 2.11 x 10 <sup>10</sup> | 10 | 1.209  | 1.813  | 1.239  | 1.234  | 1.569  |
| (C <sub>4</sub> H <sub>7</sub> )H+                                                                                                  | 7.34 x 10 <sup>9</sup>  | 10 | 0.004  | 0.017  | 0.003  | 0.009  | 0.012  |
| (C <sub>4</sub> H <sub>8</sub> )H+                                                                                                  | 3.92 x 10 <sup>9</sup>  | 10 | 0.219  | 0.357  | 0.141  | 0.186  | 0.281  |
| (C <sub>5</sub> H <sub>8</sub> )H+                                                                                                  | 2.27 x 10 <sup>9</sup>  | 9  | 0.060  | 0.129  | 0.038  | 0.077  | 0.102  |
| (C <sub>5</sub> H <sub>10</sub> )H+                                                                                                 | 1.35 x 10 <sup>9</sup>  | 9  | 0.074  | 0.140  | 0.061  | 0.092  | 0.117  |
| (C <sub>6</sub> H <sub>10</sub> )H+                                                                                                 | 4.54 x 10 <sup>8</sup>  | 9  | 0.061  | 0.138  | 0.045  | 0.088  | 0.113  |
| (C <sub>7</sub> H <sub>12</sub> )H+                                                                                                 | 1.21 x 10 <sup>8</sup>  | 8  | 0.068  | 0.152  | 0.052  | 0.099  | 0.126  |
| (C <sub>8</sub> H <sub>14</sub> )H+                                                                                                 | 3.23 x 10 <sup>7</sup>  | 8  | 0.042  | 0.103  | 0.034  | 0.068  | 0.085  |
| (C <sub>9</sub> H <sub>16</sub> )H+                                                                                                 | 1.94 x 10 <sup>7</sup>  | 7  | 0.014  | 0.035  | 0.011  | 0.023  | 0.029  |
| Aromatic VOCs                                                                                                                       |                         |    |        |        |        |        |        |
| (C <sub>6</sub> H <sub>6</sub> )H+ benzene                                                                                          | 4.60 x 10 <sup>8</sup>  | 9  |        |        |        |        | 0.268  |
| (C <sub>7</sub> H <sub>8</sub> )H+ toluene                                                                                          | 1.67 x 10 <sup>8</sup>  | 8  |        |        |        |        | 0.016  |
| (C <sub>8</sub> H <sub>8</sub> )H+ styrene                                                                                          | 4.35 x 10 <sup>7</sup>  | 8  |        |        |        |        | 0.004  |
| (C <sub>8</sub> H <sub>10</sub> )H+ C8 aromatics                                                                                    | 5.88 x 10 <sup>7</sup>  | 8  | 0.012  | 0.027  | 0.006  | 0.012  | 0.004  |
| (C <sub>9</sub> H <sub>12</sub> )H+ C9 aromatics                                                                                    | 1.99 x 10 <sup>7</sup>  | 7  | 0.021  | 0.045  | 0.015  | 0.031  | 0.010  |
| (C <sub>10</sub> H <sub>8</sub> )H+ naphthalene                                                                                     | 7.01 x 10 <sup>5</sup>  | 6  |        |        | 0.007  | 0.056  | 0.005  |

|                                 |                         |    |       |       |       |       |       |
|---------------------------------|-------------------------|----|-------|-------|-------|-------|-------|
| (C10H14)H+ C10 aromatics        | 9.73 x 10 <sup>6</sup>  | 7  | 0.013 | 0.042 | 0.008 | 0.022 | 0.007 |
| (C12H10)H+ acenaphthene         | 2.35 x 10 <sup>4</sup>  | 4  | 0.005 | 0.017 | 0.003 | 0.007 | 0.003 |
| <b>Nitrogen VOCs</b>            |                         |    |       |       |       |       |       |
| (CHNO)H+                        | 5.21 x 10 <sup>8</sup>  | 9  |       | 5.299 |       | 1.511 | 3.510 |
| (CH3NO)H+                       | 1.62 x 10 <sup>5</sup>  | 5  |       |       |       |       | 0.118 |
| (C3H3N)H+                       | 3.34 x 10 <sup>8</sup>  | 9  | 0.036 | 0.899 | 0.028 | 0.606 | 0.601 |
| (C8H5NO2)H+                     | 7.92 x 10 <sup>-2</sup> | -1 | 0.076 | 2.207 | 0.068 | 1.415 | 1.506 |
| <b>Non-Methane Hydrocarbons</b> |                         |    |       |       |       |       |       |
| Ethane                          | 5.35 x 10 <sup>10</sup> | 11 | 0.075 | 0.044 | 0.083 | 0.035 |       |
| Ethene                          | 8.25 x 10 <sup>10</sup> | 11 | 0.429 | 1.294 | 0.628 | 0.911 |       |
| Propane                         | 1.82 x 10 <sup>10</sup> | 10 | 0.000 | 0.014 | 0.000 | 0.000 |       |
| Propene                         | 2.11 x 10 <sup>10</sup> | 10 | 0.167 | 0.226 | 0.126 | 0.184 |       |
| 2-Methylpropane                 | 8.99 x 10 <sup>9</sup>  | 10 | 0.000 | 0.000 | 0.000 | 0.000 |       |
| Butane                          | 6.27 x 10 <sup>9</sup>  | 10 | 0.000 | 0.000 | 0.000 | 0.000 |       |
| Ethyne                          | 5.37 x 10 <sup>10</sup> | 11 | 0.100 | 0.087 | 0.088 | 0.098 |       |
| t-but-2-ene                     | 5.32 x 10 <sup>9</sup>  | 10 | 0.027 | 0.004 | 0.016 | 0.000 |       |
| But-1-ene                       | 7.48 x 10 <sup>9</sup>  | 10 | 0.000 | 0.000 | 0.000 | 0.005 |       |
| Cis-but-2-ene                   | 5.32 x 10 <sup>9</sup>  | 10 | 0.000 | 0.000 | 0.000 | 0.000 |       |
| 2-Methylbutane                  | 3.02 x 10 <sup>9</sup>  | 9  | 0.000 | 0.000 | 0.000 | 0.000 |       |
| n-pentane                       | 2.25 x 10 <sup>9</sup>  | 9  | 0.041 | 0.009 | 0.000 | 0.039 |       |
| 1,3-butadiene                   | 6.76 x 10 <sup>9</sup>  | 10 | 0.000 | 0.000 | 0.000 | 0.000 |       |
| t-pent-2-ene                    | 2.15 x 10 <sup>9</sup>  | 9  | 0.000 | 0.000 | 0.000 | 0.000 |       |
| Pent-1-ene                      | 2.70 x 10 <sup>9</sup>  | 9  | 0.000 | 0.000 | 0.000 | 0.000 |       |
| 2-Methylpentane                 | 1.13 x 10 <sup>9</sup>  | 9  | 0.013 | 0.008 | 0.000 | 0.021 |       |
| Isoprene                        | 2.27 x 10 <sup>9</sup>  | 9  | 0.000 | 0.000 | 0.000 | 0.009 |       |
| Hexane                          | 8.10 x 10 <sup>8</sup>  | 9  | 0.000 | 0.000 | 0.000 | 0.000 |       |
| <b>C6-C10 alkanes</b>           |                         |    |       |       |       |       |       |
| Benzene                         | 4.60 x 10 <sup>8</sup>  | 9  | 0.342 | 0.220 | 0.313 | 0.154 |       |
| Toluene                         | 1.67 x 10 <sup>8</sup>  | 8  | 0.029 | 0.020 | 0.016 | 0.012 |       |
| Ethylbenzene                    | 6.64 x 10 <sup>7</sup>  | 8  | 0.002 | 0.002 | 0.001 | 0.001 |       |
| p/m-xylene                      | 5.88 x 10 <sup>7</sup>  | 8  | 0.006 | 0.006 | 0.003 | 0.003 |       |
| Styrene                         | 4.35 x 10 <sup>7</sup>  | 8  | 0.012 | 0.004 | 0.003 | 0.003 |       |
| o-xylene                        | 4.58 x 10 <sup>7</sup>  | 8  | 0.002 | 0.002 | 0.001 | 0.000 |       |
| Propylbenzene                   | 2.75 x 10 <sup>7</sup>  | 7  | 0.004 | 0.003 | 0.001 | 0.002 |       |
| 3-ethyltoluene                  | 2.44 x 10 <sup>7</sup>  | 7  | 0.001 | 0.003 | 0.000 | 0.000 |       |
| 4-ethyltoluene                  | 2.41 x 10 <sup>7</sup>  | 7  | 0.001 | 0.000 | 0.000 | 0.000 |       |
| 135-trimethylbenzene            | 1.99 x 10 <sup>7</sup>  | 7  | 0.000 | 0.001 | 0.000 | 0.000 |       |
| 2-ethyltoluene                  | 2.09 x 10 <sup>7</sup>  | 7  | 0.000 | 0.000 | 0.000 | 0.000 |       |
| 124-trimethylbenzene            | 1.69 x 10 <sup>7</sup>  | 7  | 0.002 | 0.004 | 0.001 | 0.001 |       |
| 123-trimethylbenzene            | 1.36 x 10 <sup>7</sup>  | 7  | 0.001 | 0.000 | 0.000 | 0.000 |       |
| Hexane                          | 8.10 x 10 <sup>8</sup>  | 9  | 0.007 | 0.002 | 0.003 | 0.003 |       |
| Heptane                         | 2.93 x 10 <sup>8</sup>  | 8  | 0.008 | 0.003 | 0.005 | 0.003 |       |

|        |                    |   |       |       |       |       |  |
|--------|--------------------|---|-------|-------|-------|-------|--|
| Octane | $1.05 \times 10^8$ | 8 | 0.016 | 0.009 | 0.011 | 0.012 |  |
| Nonane | $3.81 \times 10^7$ | 8 | 0.019 | 0.010 | 0.014 | 0.009 |  |
| Decane | $1.39 \times 10^7$ | 7 | 0.018 | 0.013 | 0.011 | 0.009 |  |
